# Supplementary material for: Diagnosing Polyparasitism in a High-Prevalence Setting in Beira, Mozambique: Detection of Intestinal Parasites in Fecal Samples by Microscopy and Real-Time PCR
Source: PLoS Negl Trop Dis. 2017 Jan 23;11(1):e0005310. doi: 10.1371/journal.pntd.0005310 (PMC5289637; doi:10.1371/journal.pntd.0005310)
Supplement: S1 Database — (XLSX) [file pntd.0005310.s002.xlsx]

## Sheet: Dataset
ID	household	gender	age	sl1_d	std_pos	hw_d	hwd_pos	asf_d	asu_d	asd_pos	tr_d	trd_pos	sm_d	smd_pos	sh_d	shd_pos	sl1_r	str_pos	hw_r	hwr_pos	asf_r	asu_r	asr_pos	tr_r	trr_pos	sm_r	smr_pos	sh_r	shr_pos	hw_k	hwk_pos	asf_k	asu_k	ask_pos	tr_k	trk_pos	sm_k	smk_pos	sh_k	shk_pos	sl1_b	sl3_b	stb_pos	sl1_c	sl3_c	stc_pos	hw1_c	hw3_c	hwc_pos
1	B1	0	59	0	0	0	0	0	0	0	1	1	0	0	0	0	0	0	0	0	0	0	0	23	1	0	0	0	0	0	0	0	0	0	18	1	0	0	0	0	0	1	1	0	0	0	0	0	0
2	B1	0	10	3	1	0	0	23	0	1	4	1	0	0	0	0	1	1	0	0	0	265	1	218	1	0	0	0	0	0	0	1027	0	1	140	1	0	0	0	0	36	0	1	0	958	1	0	9	1
3	B1	0	1	0	0	0	0	0	0	0	0	0	0	0	0	0	0	0	0	0	0	0	0	3	1	0	0	0	0	0	0	0	0	0	0	0	0	0	0	0	0	0	0	0	0	0	0	0	0
4	B1	1	18	0	0	0	0	0	0	0	3	1	0	0	0	0	0	0	0	0	0	0	0	57	1	0	0	0	0	0	0	0	0	0	0	0	0	0	0	0	0	0	0	0	0	0	0	0	0
5	B2	0	25	0	0	0	0	0	0	0	0	0	0	0	0	0	0	0	0	0	0	0	0	1	1	0	0	0	0	0	0	0	0	0	6	1	0	0	0	0	0	0	0	0	0	0	0	0	0
6	B2	1	23	0	0	0	0	0	0	0	0	0	0	0	0	0	0	0	4	1	0	0	0	53	1	0	0	0	0	0	0	0	0	0	19	1	0	0	0	0	0	0	0	0	0	0	0	18	1
7	B2	1	3	0	0	0	0	0	0	0	18	1	0	0	0	0	0	0	0	0	0	0	0	143	1	0	0	0	0	0	0	0	0	0	216	1	0	0	0	0	0	0	0	0	0	0	0	0	0
8	B2	1	2	0	0	0	0	0	0	0	14	1	0	0	0	0	0	0	0	0	0	0	0	134	1	0	0	0	0	0	0	0	0	0	27	1	0	0	0	0	1	0	1	0	0	0	0	0	0
10	B2	1	11	0	0	4	1	0	0	0	0	0	0	0	0	0	3	1	13	1	0	0	0	0	0	0	0	0	0	18	1	0	0	0	0	0	0	0	0	0	4	0	1	0	0	0	0	92	1
11	B3	0	33	0	0	0	0	0	0	0	0	0	0	0	0	0	0	0	0	0	0	0	0	0	0	0	0	0	0	0	0	0	0	0	0	0	0	0	0	0	0	0	0	0	1660	1	0	0	0
12	B3	1	25	0	0	0	0	0	0	0	0	0	0	0	0	0	0	0	12	1	0	0	0	26	1	0	0	0	0	4	1	0	0	0	7	1	0	0	0	0	1	0	1	0	0	0	0	6	1
13	B3	1	4	0	0	0	0	0	0	0	6	1	0	0	0	0	0	0	0	0	0	0	0	120	1	0	0	0	0	0	0	0	0	0	52	1	0	0	0	0	244	0	1	0	200000	1	0	0	0
14	B4	0	25	0	0	3	1	1	1	1	0	0	0	0	0	0	0	0	57	1	1	6	1	28	1	0	0	0	0	58	1	0	45	1	17	1	0	0	0	0	0	0	0	0	0	0	0	76	1
15	B4	1	20	0	0	0	0	0	9	1	31	1	0	0	0	0	0	0	8	1	23	0	1	776	1	0	0	0	0	0	0	0	0	0	579	1	0	0	0	0	0	0	0	0	271	1	0	36	1
16	B4	0	4	9	1	2	1	153	0	1	146	1	0	0	0	0	6	1	23	1	0	244	1	771	1	0	0	0	0	12	1	340	2	1	544	1	0	0	0	0	2	0	1	0	312	1	0	74	1
17	B4	1	1	0	0	0	0	0	0	0	4	1	0	0	0	0	0	0	0	0	0	0	0	27	1	0	0	0	0	0	0	0	0	0	15	1	0	0	0	0	0	0	0	0	0	0	0	122	1
18	B1	1	59	0	0	0	0	0	0	0	1	1	0	0	0	0	0	0	51	1	0	0	0	0	0	0	0	0	0	32	1	0	0	0	0	0	0	0	0	0	0	0	0	0	0	0	0	0	0
19	B5	1	9	0	0	0	0	0	0	0	0	0	0	0	0	0	0	0	0	0	0	0	0	10	1	0	0	0	0	0	0	0	0	0	7	1	0	0	0	0	0	0	0	0	0	0	0	0	0
20	B5	0	6	0	0	0	0	142	11	1	3	1	0	0	0	0	0	0	0	0	4	69	1	51	1	0	0	0	0	0	0	431	0	1	24	1	0	0	0	0	0	0	0	0	0	0	0	0	0
21	B5	1	4	0	0	0	0	82	0	1	10	1	0	0	0	0	0	0	0	0	0	5	1	93	1	0	0	0	0	0	0	756	0	1	61	1	0	0	0	0	0	0	0	0	34	1	0	0	0
22	B5	0	1	0	0	0	0	13	0	1	0	0	0	0	0	0	0	0	0	0	0	21	1	0	0	0	0	0	0	0	0	226	0	1	8	1	0	0	0	0	0	0	0	-1	-1	0	-1	-1	0
23	B5	0	20	0	0	0	0	0	0	0	3	1	0	0	0	0	0	0	0	0	0	0	0	106	1	0	0	0	0	0	0	0	0	0	64	1	0	0	0	0	0	0	0	0	0	0	0	0	0
24	C1	0	47	0	0	0	0	0	0	0	2	1	0	0	0	0	0	0	0	0	0	0	0	64	1	0	0	0	0	0	0	0	0	0	30	1	0	0	0	0	0	0	0	0	0	0	0	0	0
25	C1	0	20	0	0	0	0	0	0	0	1	1	0	0	0	0	0	0	0	0	0	0	0	22	1	0	0	0	0	0	0	0	0	0	27	1	0	0	0	0	0	0	0	0	0	0	0	0	0
26	C1	1	24	0	0	0	0	0	0	0	0	0	0	0	0	0	0	0	0	0	0	0	0	11	1	0	0	0	0	0	0	0	0	0	16	1	0	0	0	0	0	0	0	0	0	0	0	0	0
27	C1	0	6	0	0	0	0	0	0	0	0	0	0	0	0	0	0	0	0	0	0	0	0	0	0	0	0	0	0	0	0	0	0	0	0	0	0	0	0	0	0	0	0	0	0	0	0	0	0
28	B3	0	2	0	0	0	0	0	0	0	0	0	0	0	0	0	0	0	0	0	0	0	0	0	0	0	0	0	0	0	0	0	0	0	0	0	0	0	0	0	4	0	1	6	580	1	0	0	0
29	B5	0	43	0	0	0	0	0	0	0	1	1	0	0	0	0	0	0	0	0	0	0	0	66	1	0	0	0	0	0	0	0	0	0	41	1	0	0	0	0	0	0	0	0	0	0	0	0	0
30	B5	0	12	0	0	1	1	17	0	1	12	1	0	0	0	0	0	0	21	1	0	37	1	289	1	0	0	0	0	24	1	146	0	1	184	1	0	0	0	0	0	0	0	0	0	0	0	534	1
31	B6	1	45	0	0	0	0	0	0	0	10	1	0	0	0	0	0	0	0	0	0	0	0	116	1	0	0	0	0	0	0	0	0	0	155	1	0	0	0	0	0	0	0	0	0	0	0	0	0
32	B6	1	13	0	0	2	1	150	0	1	24	1	0	0	0	0	0	0	9	1	3	211	1	320	1	0	0	0	0	0	0	1000	0	1	260	1	0	0	0	0	1	0	1	0	600	1	0	83	1
33	B6	1	9	0	0	0	0	0	0	0	24	1	0	0	0	0	0	0	0	0	0	0	0	692	1	0	0	0	0	0	0	0	0	0	604	1	0	0	0	0	0	0	0	0	0	0	0	0	0
36	C3	0	43	0	0	0	0	0	0	0	1	1	0	0	0	0	17	1	0	0	0	0	0	28	1	0	0	0	0	0	0	0	0	0	10	1	0	0	0	0	21	0	1	0	50600	1	0	0	0
37	C3	1	33	0	0	0	0	0	0	0	8	1	0	0	0	0	0	0	0	0	0	0	0	228	1	0	0	0	0	0	0	0	0	0	98	1	0	0	0	0	0	0	0	0	0	0	0	0	0
38	C3	0	23	0	0	0	0	13	0	1	9	1	0	0	0	0	0	0	0	0	0	40	1	282	1	0	0	0	0	0	0	199	0	1	43	1	0	0	0	0	0	0	0	0	0	0	0	0	0
39	C3	1	18	0	0	0	0	0	0	0	9	1	0	0	0	0	0	0	0	0	0	0	0	257	1	0	0	0	0	0	0	0	0	0	31	1	0	0	0	0	0	0	0	0	0	0	0	0	0
40	C3	0	16	0	0	0	0	0	0	0	8	1	0	0	0	0	0	0	0	0	0	0	0	173	1	0	0	0	0	0	0	0	0	0	51	1	0	0	0	0	5	0	1	0	20070	1	0	0	0
41	C3	0	13	0	0	0	0	0	16	1	35	1	0	0	0	0	0	0	13	1	15	0	1	875	1	0	0	0	0	12	1	0	95	1	286	1	0	0	0	0	0	0	0	0	0	0	0	306	1
42	C3	0	11	0	0	0	0	181	0	1	10	1	0	0	0	0	0	0	0	0	0	279	1	76	1	0	0	0	0	0	0	598	2	1	110	1	0	0	0	0	0	0	0	0	47	1	0	0	0
43	C3	0	4	0	0	0	0	201	3	1	4	1	0	0	0	0	0	0	12	1	4	596	1	101	1	0	0	0	0	0	0	2376	0	1	98	1	0	0	0	0	0	0	0	0	0	0	0	32	1
44	C3	0	2	21	1	0	0	0	0	0	0	0	0	0	0	0	15	1	4	1	0	0	0	26	1	0	0	0	0	10	1	0	0	0	14	1	0	0	0	0	150	0	1	0	100000	1	0	0	0
45	C3	0	2	0	0	0	0	0	0	0	9	1	0	0	0	0	0	0	0	0	0	0	0	409	1	0	0	0	0	0	0	0	0	0	69	1	0	0	0	0	0	0	0	0	0	0	0	0	0
46	C6	0	68	0	0	10	1	0	0	0	1	1	0	0	0	0	0	0	73	1	0	0	0	9	1	0	0	0	0	541	1	0	0	0	39	1	0	0	0	0	0	0	0	0	0	0	0	447	1
47	C6	0	34	0	0	0	0	0	0	0	0	0	0	0	0	0	0	0	0	0	0	0	0	0	0	0	0	0	0	0	0	0	0	0	0	0	0	0	0	0	0	0	0	0	0	0	0	0	0
48	C6	1	24	0	0	0	0	15	0	1	14	1	0	0	0	0	0	0	0	0	0	458	1	302	1	0	0	0	0	0	0	214	6	1	112	1	0	0	0	0	0	0	0	0	0	0	0	0	0
49	B6	0	2	0	0	0	0	0	0	0	0	0	0	0	0	0	0	0	0	0	0	0	0	0	0	0	0	0	0	0	0	0	0	0	5	1	0	0	0	0	2	0	1	0	0	0	0	200	1
50	B6	1	1	0	0	0	0	27	10	1	13	1	0	0	0	0	0	0	0	0	18	54	1	26	1	0	0	0	0	0	0	208	0	1	106	1	0	0	0	0	0	0	0	0	0	0	0	0	0
51	B6	1	15	1	1	2	1	67	3	1	94	1	0	0	0	0	2	1	15	1	0	97	1	828	1	0	0	0	0	6	1	230	0	1	325	1	0	0	0	0	3	0	1	0	217	1	0	150	1
52	B6	1	5	0	0	0	0	39	1	1	11	1	0	0	0	0	2	1	0	0	0	15	1	198	1	0	0	0	0	2	1	253	0	1	142	1	0	0	0	0	17	0	1	0	781	1	0	6	1
53	A6	0	-1	0	0	0	0	0	0	0	1	1	0	0	0	0	0	0	0	0	0	0	0	8	1	0	0	0	0	0	0	0	0	0	33	1	0	0	0	0	0	0	0	0	23	1	0	0	0
54	A6	1	-1	0	0	0	0	0	0	0	1	1	0	0	0	0	0	0	0	0	0	0	0	73	1	0	0	0	0	0	0	0	0	0	11	1	0	0	0	0	0	0	0	0	0	0	0	0	0
56	A7	0	21	0	0	0	0	0	3	1	3	1	0	0	0	0	0	0	0	0	24	0	1	97	1	0	0	0	0	47	1	0	0	0	46	1	0	0	0	0	0	0	0	0	0	0	0	0	0
57	A7	0	21	0	0	4	1	0	0	0	1	1	0	0	0	0	0	0	62	1	0	0	0	3	1	0	0	0	0	84	1	0	0	0	9	1	0	0	0	0	0	0	0	0	6	1	0	750	1
58	A7	1	24	0	0	0	0	2	0	1	2	1	0	0	0	0	0	0	0	0	0	45	1	164	1	0	0	0	0	7	1	48	0	1	36	1	0	0	0	0	2	0	1	0	0	0	0	4	1
59	B6	0	-1	0	0	0	0	0	9	1	2	1	0	0	0	0	0	0	0	0	0	0	0	12	1	2	1	0	0	0	0	0	83	1	15	1	0	0	0	0	0	0	0	0	0	0	0	0	0
60	C2	1	2	1	1	0	0	0	0	0	7	1	0	0	0	0	65	1	0	0	0	0	0	436	1	0	0	0	0	0	0	0	0	0	329	1	0	0	0	0	70	0	1	0	2500	1	0	0	0
61	C6	1	16	0	0	0	0	21	11	1	12	1	0	0	0	0	0	0	0	0	3	11	1	820	1	0	0	0	0	0	0	117	42	1	98	1	0	0	0	0	0	0	0	0	592	1	0	0	0
62	C6	0	14	0	0	0	0	38	0	1	20	1	0	0	0	0	0	0	0	0	5	291	1	314	1	0	0	0	0	0	0	792	0	1	346	1	0	0	0	0	0	0	0	0	280	1	0	0	0
63	C6	0	2	0	0	0	0	0	1	1	21	1	0	0	0	0	1	1	0	0	5	0	1	293	1	0	0	0	0	0	0	0	16	1	90	1	0	0	0	0	1	0	1	0	0	0	0	0	0
64	E10	0	-1	0	0	3	1	0	0	0	0	0	0	0	0	0	0	0	7	1	0	0	0	0	0	0	0	0	0	20	1	0	0	0	0	0	0	0	0	0	0	0	0	0	474	1	0	150	1
65	E10	1	27	0	0	0	0	0	0	0	38	1	0	0	0	0	0	0	0	0	0	0	0	453	1	0	0	0	0	7	1	0	0	0	300	1	0	0	0	0	0	0	0	0	0	0	0	9	1
66	E10	0	9	0	0	0	0	46	33	1	158	1	0	0	0	0	0	0	15	1	135	180	1	1146	1	0	0	0	0	28	1	1065	166	1	905	1	0	0	0	0	0	0	0	0	0	0	0	420	1
67	E10	0	6	0	0	0	0	0	0	0	229	1	0	0	0	0	0	0	5	1	0	0	0	7200	1	0	0	0	0	25	1	0	0	0	2394	1	0	0	0	0	0	0	0	0	108	1	0	39	1
68	E10	0	4	0	0	0	0	0	0	0	141	1	0	0	0	0	1	1	0	0	0	0	0	1124	1	0	0	0	0	0	0	0	0	0	546	1	0	0	0	0	1	0	1	0	226	1	0	0	0
72	B8	1	30	0	0	0	0	0	12	1	6	1	0	0	0	0	0	0	0	0	106	0	1	98	1	0	0	0	0	11	1	0	121	1	125	1	0	0	0	0	0	0	0	0	0	0	0	14	1
73	B8	1	18	0	0	0	0	80	27	1	3	1	0	0	0	0	0	0	0	0	14	103	1	107	1	0	0	0	0	0	0	447	52	1	49	1	0	0	0	0	0	0	0	0	0	0	0	0	0
74	B8	1	9	6	1	0	0	0	3	1	19	1	0	0	0	0	63	1	2	1	0	0	0	610	1	0	0	0	0	13	1	0	41	1	273	1	0	0	0	0	281	0	1	0	20000	1	0	50	1
75	B8	0	7	25	1	0	0	112	38	1	24	1	0	0	0	0	6	1	0	0	170	1240	1	290	1	0	0	0	0	0	0	1086	171	1	160	1	0	0	0	0	55	0	1	0	200000	1	0	0	0
76	B8	0	5	3	1	0	0	33	0	1	5	1	0	0	0	0	0	0	0	0	0	20	1	53	1	0	0	0	0	0	0	120	6	1	54	1	0	0	0	0	70	0	1	0	40000	1	0	0	0
77	E9	1	41	0	0	0	0	65	0	1	2	1	0	0	0	0	0	0	0	0	0	11	1	20	1	0	0	0	0	0	0	434	0	1	25	1	0	0	0	0	0	0	0	0	0	0	0	0	0
78	E9	1	-1	0	0	0	0	59	2	1	9	1	0	0	0	0	0	0	0	0	1	940	1	130	1	0	0	0	0	0	0	1364	26	1	184	1	0	0	0	0	0	0	0	0	0	0	0	0	0
79	E9	0	-1	0	0	0	0	2	0	1	18	1	0	0	0	0	0	0	0	0	0	0	0	370	1	0	0	0	0	0	0	0	8	1	246	1	0	0	0	0	0	0	0	0	0	0	0	0	0
80	E9	0	12	0	0	0	0	68	0	1	3	1	0	0	0	0	0	0	2	1	0	44	1	116	1	0	0	0	0	0	0	109	0	1	21	1	0	0	0	0	0	0	0	0	0	0	0	29	1
83	B5	1	17	0	0	0	0	0	0	0	2	1	0	0	0	0	0	0	0	0	0	0	0	68	1	0	0	0	0	0	0	0	0	0	33	1	0	0	0	0	0	0	0	0	0	0	0	0	0
84	B6	0	-1	0	0	1	1	0	1	1	22	1	0	0	0	0	0	0	107	1	0	0	0	403	1	0	0	0	0	12	1	0	0	0	50	1	0	0	0	0	19	0	1	0	452	1	0	296	1
86	B6	1	16	0	0	0	0	81	6	1	6	1	0	0	0	0	0	0	3	1	0	646	1	64	1	0	0	0	0	15	1	364	0	1	60	1	0	0	0	0	40	0	1	0	8000	1	0	38	1
87	B7	0	-1	0	0	0	0	0	0	0	0	0	0	0	0	0	0	0	0	0	0	0	0	0	0	0	0	0	0	0	0	0	0	0	0	0	0	0	0	0	0	0	0	0	0	0	0	0	0
89	D2	0	58	21	1	0	0	8	0	1	2	1	0	0	0	0	0	0	0	0	3	171	1	46	1	0	0	0	0	0	0	116	0	1	23	1	0	0	0	0	619	0	1	0	200000	1	0	0	0
91	D3	1	20	0	0	0	0	29	0	1	4	1	0	0	0	0	0	0	0	0	0	38	1	130	1	0	0	0	0	0	0	137	0	1	38	1	0	0	0	0	1	0	1	0	238	1	0	0	0
93	D3	0	16	0	0	0	0	1	0	1	2	1	0	0	0	0	0	0	0	0	0	4	1	44	1	0	0	0	0	0	0	38	1	1	21	1	0	0	0	0	0	0	0	0	0	0	0	0	0
96	E9	0	17	0	0	0	0	0	0	0	13	1	0	0	0	0	0	0	0	0	0	0	0	486	1	0	0	0	0	0	0	0	19	1	82	1	0	0	0	0	0	0	0	0	0	0	0	0	0
97	E9	0	10	0	0	0	0	150	0	1	16	1	0	0	0	0	0	0	4	1	6	168	1	252	1	0	0	0	0	0	0	399	14	1	82	1	0	0	0	0	0	0	0	0	1176	1	0	35	1
99	D2	1	45	0	0	0	0	8	0	1	0	0	0	0	0	0	0	0	0	0	0	1	1	10	1	0	0	0	0	0	0	64	6	1	6	1	0	0	0	0	0	0	0	0	0	0	0	0	0
100	D2	1	25	0	0	0	0	0	26	1	3	1	0	0	0	0	0	0	0	0	11	0	1	73	1	0	0	0	0	0	0	0	321	1	42	1	0	0	0	0	0	0	0	0	0	0	0	0	0
102	D2	0	5	1	1	0	0	0	0	0	3	1	0	0	0	0	12	1	0	0	0	0	0	134	1	0	0	0	0	0	0	0	0	0	8	1	0	0	0	0	31	0	1	0	12000	1	0	0	0
103	E8	1	56	0	0	0	0	0	0	0	10	1	0	0	0	0	0	0	29	1	0	0	0	306	1	0	0	0	0	20	1	0	0	0	130	1	0	0	0	0	0	0	0	0	0	0	0	233	1
104	E8	1	34	0	0	0	0	0	0	0	0	0	0	0	0	0	0	0	0	0	0	0	0	11	1	0	0	0	0	0	0	0	0	0	4	1	0	0	0	0	0	0	0	0	0	0	0	0	0
105	E8	1	12	0	0	1	1	11	0	1	7	1	0	0	0	0	0	0	116	1	0	100	1	383	1	0	0	0	0	27	1	389	0	1	196	1	0	0	0	0	0	0	0	0	0	0	0	3008	1
106	E8	1	9	2	1	0	0	112	2	1	28	1	0	0	0	0	0	0	5	1	0	38	1	635	1	0	0	0	0	0	0	1022	0	1	608	1	0	0	0	0	0	0	0	0	0	0	0	2	1
107	E8	0	3	0	0	0	0	0	0	0	1	1	0	0	0	0	0	0	0	0	0	0	0	22	1	0	0	0	0	0	0	0	0	0	5	1	0	0	0	0	0	0	0	0	0	0	0	0	0
108	E8	1	35	0	0	0	0	72	7	1	32	1	0	0	0	0	0	0	0	0	0	293	1	830	1	0	0	0	0	0	0	444	10	1	365	1	0	0	0	0	0	0	0	0	0	0	0	0	0
109	C7	0	39	0	0	0	0	0	0	0	13	1	0	0	0	0	0	0	0	0	0	0	0	134	1	0	0	0	0	0	0	0	0	0	79	1	0	0	0	0	0	0	0	0	0	0	0	0	0
110	C7	1	28	0	0	0	0	0	0	0	5	1	0	0	0	0	0	0	7	1	0	0	0	362	1	0	0	0	0	15	1	0	0	0	90	1	0	0	0	0	1	0	1	0	14	1	0	343	1
111	C7	0	22	0	0	0	0	0	2	1	0	0	0	0	0	0	0	0	0	0	34	0	1	12	1	0	0	0	0	0	0	0	13	1	2	1	0	0	0	0	0	0	0	0	0	0	0	22	1
113	C7	1	8	0	0	0	0	60	28	1	21	1	0	0	0	0	4	1	0	0	23	87	1	616	1	0	0	0	0	0	0	470	138	1	118	1	0	0	0	0	19	0	1	0	50	1	0	0	0
115	E6	1	23	0	0	0	0	0	1	1	3	1	0	0	0	0	0	0	0	0	0	0	0	24	1	0	0	0	0	0	0	0	0	0	9	1	1	1	3	1	0	0	0	0	0	0	0	0	0
116	E6	1	19	0	0	0	0	0	12	1	19	1	0	0	0	0	0	0	2	1	17	0	1	332	1	0	0	0	0	0	0	0	42	1	105	1	0	0	0	0	0	0	0	0	0	0	0	4	1
117	E6	0	11	0	0	0	0	0	0	0	13	1	0	0	0	0	0	0	0	0	0	0	0	337	1	0	0	0	0	0	0	0	0	0	289	1	0	0	0	0	0	0	0	0	0	0	0	0	0
118	E7	0	33	0	0	0	0	0	0	0	0	0	0	0	0	0	0	0	0	0	0	0	0	0	0	0	0	0	0	0	0	0	0	0	1	1	0	0	0	0	0	0	0	0	0	0	0	0	0
119	E7	1	33	0	0	0	0	0	0	0	1	1	0	0	0	0	0	0	17	1	0	0	0	96	1	0	0	0	0	5	1	0	0	0	40	1	0	0	0	0	0	0	0	0	0	0	0	0	0
120	E7	1	14	0	0	0	0	97	0	1	6	1	0	0	0	0	0	0	0	0	7	1186	1	102	1	0	0	0	0	0	0	1462	11	1	67	1	0	0	0	0	0	0	0	0	0	0	0	0	0
121	E7	0	5	0	0	0	0	0	0	0	3	1	0	0	0	0	0	0	6	1	0	0	0	29	1	0	0	0	0	8	1	0	0	0	28	1	0	0	0	0	0	0	0	0	0	0	0	204	1
123	D5	0	32	0	0	0	0	0	0	0	0	0	0	0	0	0	0	0	0	0	0	0	0	4	1	0	0	0	0	0	0	0	0	0	13	1	0	0	0	0	0	0	0	0	0	0	0	0	0
124	D5	1	19	0	0	0	0	0	0	0	0	0	0	0	0	0	0	0	0	0	0	0	0	0	0	0	0	0	0	0	0	0	0	0	0	0	0	0	0	0	0	0	0	0	0	0	0	0	0
125	F7	1	21	0	0	0	0	0	0	0	0	0	0	0	0	0	0	0	15	1	0	0	0	37	1	0	0	0	0	34	1	0	0	0	37	1	0	0	0	0	0	0	0	0	0	0	0	110	1
126	F7	1	10	0	0	3	1	202	0	1	8	1	0	0	0	0	0	0	94	1	0	472	1	54	1	0	0	0	0	213	1	1960	16	1	76	1	0	0	0	0	0	0	0	0	0	0	0	2032	1
127	D4	1	30	0	0	0	0	4	3	1	12	1	0	0	0	0	0	0	0	0	36	32	1	162	1	0	0	0	0	0	0	207	90	1	178	1	0	0	0	0	0	0	0	0	0	0	0	0	0
128	D5	0	29	0	0	0	0	0	0	0	1	1	0	0	0	0	0	0	0	0	0	0	0	8	1	0	0	0	0	0	0	0	0	0	10	1	0	0	0	0	0	0	0	0	0	0	0	0	0
129	D5	1	26	0	0	0	0	0	0	0	2	1	0	0	0	0	0	0	0	0	0	0	0	14	1	0	0	0	0	0	0	0	0	0	7	1	0	0	0	0	0	0	0	0	0	0	0	35	1
130	D5	1	26	0	0	0	0	0	0	0	23	1	0	0	0	0	0	0	0	0	0	0	0	100	1	0	0	0	0	0	0	0	0	0	205	1	0	0	0	0	0	0	0	0	0	0	0	0	0
131	D5	1	24	0	0	0	0	0	0	0	0	0	0	0	0	0	0	0	15	1	0	0	0	12	1	0	0	0	0	14	1	0	0	0	6	1	0	0	0	0	0	0	0	0	0	0	0	38	1
132	D5	0	17	0	0	0	0	11	3	1	9	1	0	0	0	0	0	0	7	1	5	83	1	1510	1	0	0	0	0	3	1	439	127	1	72	1	0	0	0	0	0	0	0	0	0	0	0	8	1
133	D5	1	3	0	0	0	0	0	0	0	5	1	0	0	0	0	0	0	0	0	0	0	0	142	1	0	0	0	0	0	0	0	0	0	88	1	0	0	0	0	0	0	0	0	0	0	0	0	0
134	D5	1	4	0	0	0	0	0	0	0	0	0	0	0	0	0	0	0	0	0	0	0	0	8	1	0	0	0	0	0	0	0	0	0	11	1	0	0	0	0	0	0	0	0	0	0	0	0	0
135	E2	1	39	0	0	0	0	0	0	0	2	1	0	0	0	0	0	0	0	0	0	0	0	42	1	0	0	0	0	0	0	0	0	0	20	1	0	0	0	0	0	0	0	0	0	0	0	0	0
136	E2	0	13	0	0	0	0	4	4	1	16	1	0	0	0	0	1	1	1	1	8	69	1	244	1	0	0	0	0	3	1	107	62	1	328	1	0	0	0	0	0	0	0	0	21500	1	0	0	0
137	E2	0	5	31	1	0	0	2	11	1	12	1	0	0	0	0	324	1	0	0	24	18	1	244	1	0	0	0	0	0	0	26	90	1	168	1	0	0	0	0	412	0	1	0	200000	1	0	0	0
138	E3	1	35	0	0	0	0	0	14	1	0	0	0	0	0	0	0	0	0	0	377	1	1	6	1	0	0	0	0	0	0	3	241	1	3	1	0	0	0	0	0	0	0	0	0	0	0	0	0
139	E3	1	16	0	0	0	0	22	0	1	20	1	0	0	0	0	0	0	0	0	2	402	1	788	1	0	0	0	0	0	0	220	0	1	350	1	0	0	0	0	0	0	0	0	30	1	0	0	0
140	E4	0	45	0	0	0	0	0	5	1	1	1	0	0	0	0	0	0	0	0	10	2	1	32	1	0	0	0	0	0	0	2	24	1	12	1	0	0	0	0	0	0	0	0	0	0	0	0	0
141	E4	1	40	0	0	0	0	40	0	1	3	1	0	0	0	0	0	0	0	0	13	1523	1	288	1	0	0	0	0	0	0	1364	9	1	85	1	0	0	0	0	0	0	0	0	296	1	0	4	1
142	E4	0	11	0	0	0	0	106	0	1	4	1	0	0	0	0	0	0	0	0	0	1000	1	303	1	0	0	0	0	0	0	792	0	1	120	1	0	0	0	0	0	0	0	0	0	0	0	0	0
143	E4	1	11	0	0	0	0	454	8	1	6	1	0	0	0	0	0	0	0	0	23	6500	1	500	1	0	0	0	0	0	0	2190	28	1	266	1	0	0	0	0	0	0	0	0	0	0	0	0	0
144	E4	0	4	0	0	0	0	22	44	1	4	1	0	0	0	0	0	0	0	0	55	108	1	50	1	0	0	0	0	0	0	237	275	1	55	1	0	0	0	0	0	0	0	0	0	0	0	0	0
145	E4	0	4	0	0	0	0	61	20	1	17	1	0	0	0	0	0	0	0	0	34	254	1	474	1	0	0	0	0	0	0	432	155	1	151	1	0	0	0	0	0	0	0	0	0	0	0	0	0
146	D10	1	27	0	0	0	0	0	0	0	2	1	0	0	0	0	0	0	10	1	0	0	0	74	1	0	0	0	0	7	1	0	16	1	31	1	0	0	0	0	0	0	0	0	0	0	0	29	1
147	D10	0	7	0	0	0	0	216	8	1	15	1	0	0	0	0	0	0	0	0	25	546	1	58	1	0	0	0	0	0	0	1376	71	1	192	1	0	0	0	0	0	0	0	0	0	0	0	0	0
148	D10	0	3	15	1	0	0	0	42	1	68	1	0	0	0	0	38	1	0	0	28	0	1	368	1	0	0	0	0	0	0	0	439	1	777	1	0	0	0	0	139	0	1	0	25000	1	0	0	0
149	E2	0	21	0	0	0	0	0	0	0	3	1	0	0	0	0	0	0	0	0	0	0	0	210	1	0	0	0	0	0	0	0	0	0	73	1	0	0	0	0	0	0	0	0	141	1	0	0	0
150	E2	0	17	1	1	0	0	0	0	0	7	1	0	0	0	0	0	0	0	0	0	0	0	340	1	0	0	0	0	0	0	0	0	0	343	1	0	0	0	0	10	0	1	0	7000	1	0	0	0
151	E2	0	16	0	0	0	0	0	2	1	9	1	0	0	0	0	0	0	0	0	4	0	1	152	1	0	0	0	0	0	0	0	12	1	145	1	0	0	0	0	0	0	0	0	0	0	0	0	0
152	E2	0	8	5	1	0	0	0	1	1	7	1	0	0	0	0	5	1	0	0	0	14	1	157	1	0	0	0	0	0	0	54	0	1	368	1	0	0	0	0	4	0	1	0	2500	1	0	0	0
153	E4	1	22	0	0	0	0	12	5	1	1	1	0	0	0	0	0	0	0	0	4	533	1	154	1	0	0	0	0	0	0	1280	4	1	90	1	0	0	0	0	0	0	0	0	0	0	0	0	0
154	E4	1	15	0	0	0	0	50	0	1	7	1	0	0	0	0	0	0	0	0	19	1764	1	53	1	0	0	0	0	0	0	816	20	1	48	1	0	0	0	0	0	0	0	0	0	0	0	0	0
155	C5	0	48	0	0	0	0	0	5	1	16	1	0	0	0	0	0	0	2	1	11	0	1	389	1	0	0	0	0	17	1	0	95	1	98	1	0	0	0	0	1	0	1	0	278	1	0	211	1
156	E4	1	6	0	0	0	0	140	1	1	72	1	0	0	0	0	0	0	8	1	0	783	1	777	1	0	0	0	0	29	1	1212	13	1	642	1	0	0	0	0	0	0	0	0	0	0	0	200	1
157	D6	1	67	0	0	0	0	6	11	1	27	1	0	0	0	0	0	0	0	0	29	108	1	226	1	0	0	0	0	0	0	420	176	1	722	1	0	0	0	0	0	0	0	0	0	0	0	0	0
158	D6	1	21	0	0	0	0	21	0	1	10	1	0	0	0	0	0	0	0	0	4	351	1	210	1	0	0	0	0	0	0	1728	0	1	125	1	0	0	0	0	0	0	0	0	0	0	0	0	0
159	B9	1	42	0	0	0	0	0	0	0	3	1	0	0	0	0	0	0	0	0	0	0	0	24	1	0	0	0	0	0	0	0	0	0	23	1	0	0	0	0	0	0	0	0	0	0	0	0	0
160	B9	1	36	0	0	0	0	1	0	1	0	0	0	0	0	0	0	0	66	1	0	152	1	233	1	0	0	0	0	50	1	247	0	1	138	1	0	0	0	0	0	0	0	0	0	0	0	101	1
161	B9	1	8	0	0	0	0	0	0	0	11	1	0	0	0	0	3	1	11	1	0	2	1	363	1	0	0	0	0	22	1	0	0	0	477	1	0	0	0	0	4	0	1	0	61	1	0	137	1
162	C5	1	39	0	0	0	0	3	4	1	13	1	0	0	0	0	0	0	0	0	13	104	1	526	1	0	0	0	0	0	0	221	7	1	251	1	0	0	0	0	0	0	0	0	0	0	0	0	0
163	C5	0	18	0	0	0	0	1	2	1	6	1	0	0	0	0	0	0	0	0	5	291	1	471	1	0	0	0	0	0	0	375	18	1	447	1	0	0	0	0	0	0	0	0	0	0	0	0	0
164	C5	1	9	0	0	0	0	0	0	0	0	0	0	0	0	0	0	0	0	0	0	0	0	0	0	0	0	0	0	1	1	0	0	0	0	0	0	0	0	0	0	0	0	0	0	0	0	0	0
165	D6	1	6	0	0	0	0	201	95	1	92	1	0	0	0	0	0	0	0	0	23	242	1	772	1	0	0	0	0	0	0	1328	488	1	656	1	0	0	0	0	0	0	0	0	0	0	0	0	0
166	D6	1	26	0	0	0	0	1	0	1	3	1	0	0	0	0	0	0	0	0	0	74	1	68	1	0	0	0	0	0	0	164	0	1	101	1	0	0	0	0	0	0	0	0	0	0	0	0	0
167	B9	0	15	0	0	0	0	9	0	1	2	1	0	0	0	0	0	0	7	1	0	210	1	60	1	0	0	0	0	8	1	206	0	1	40	1	0	0	0	0	0	0	0	0	0	0	0	129	1
168	B9	1	9	0	0	0	0	29	1	1	6	1	0	0	0	0	0	0	0	0	5	301	1	82	1	0	0	0	0	0	0	565	10	1	209	1	0	0	0	0	1	0	1	0	0	0	0	0	0
169	C9	1	56	0	0	0	0	0	0	0	0	0	0	0	0	0	0	0	0	0	0	4	1	6	1	0	0	0	0	0	0	0	0	0	14	1	0	0	0	0	0	0	0	0	0	0	0	0	0
170	C9	1	31	0	0	0	0	0	0	0	0	0	0	0	0	0	0	0	0	0	0	0	0	3	1	0	0	0	0	0	0	0	0	0	3	1	0	0	0	0	0	0	0	0	0	0	0	0	0
171	C9	1	21	0	0	0	0	0	0	0	2	1	0	0	0	0	0	0	0	0	0	0	0	13	1	0	0	0	0	0	0	0	0	0	5	1	0	0	0	0	0	0	0	0	0	0	0	0	0
172	C9	0	2	0	0	0	0	39	0	1	1	1	0	0	0	0	0	0	0	0	0	371	1	32	1	0	0	0	0	0	0	415	0	1	23	1	0	0	0	0	0	0	0	0	0	0	0	0	0
173	D5	0	7	0	0	0	0	0	5	1	3	1	0	0	0	0	0	0	0	0	4	0	1	35	1	0	0	0	0	0	0	0	20	1	44	1	0	0	0	0	0	0	0	0	0	0	0	0	0
174	D7	0	19	0	0	0	0	6	0	1	11	1	0	0	0	0	0	0	0	0	0	27	1	311	1	0	0	0	0	0	0	49	0	1	236	1	0	0	0	0	0	0	0	0	0	0	0	0	0
175	D7	0	17	0	0	2	1	17	0	1	12	1	0	0	0	0	0	0	37	1	0	79	1	214	1	0	0	0	0	39	1	500	0	1	352	1	0	0	0	0	0	0	0	0	0	0	0	44	1
176	E5	0	36	0	0	0	0	0	0	0	0	0	0	0	0	0	0	0	37	1	0	10	1	25	1	2	1	0	0	67	1	124	0	1	41	1	5	1	0	0	0	0	0	0	0	0	0	76	1
177	F3	0	67	0	0	1	1	0	0	0	5	1	0	0	0	0	0	0	2	1	0	1	1	169	1	0	0	0	0	1	1	0	0	0	29	1	0	0	0	0	0	0	0	0	209	1	0	0	0
178	F3	1	36	0	0	0	0	0	4	1	2	1	0	0	0	0	0	0	0	0	5	0	1	17	1	0	0	0	0	0	0	0	16	1	37	1	0	0	0	0	0	0	0	0	0	0	0	0	0
179	F3	0	26	0	0	0	0	0	0	0	1	1	0	0	0	0	0	0	0	0	0	0	0	3	1	13	1	0	0	0	0	0	0	0	8	1	8	1	0	0	0	0	0	0	245	1	0	0	0
180	F3	1	12	0	0	0	0	38	3	1	77	1	0	0	0	0	0	0	0	0	51	228	1	263	1	0	0	0	0	0	0	992	158	1	1248	1	0	0	0	0	0	0	0	0	0	0	0	0	0
181	F3	1	6	0	0	0	0	0	0	0	312	1	0	0	0	0	0	0	0	0	0	0	0	976	1	0	0	0	0	0	0	0	0	0	1900	1	0	0	0	0	0	0	0	0	0	0	0	0	0
182	F3	1	5	0	0	0	0	0	0	0	1	1	0	0	0	0	0	0	0	0	0	0	0	27	1	0	0	0	0	0	0	0	0	0	92	1	0	0	0	0	0	0	0	0	0	0	0	0	0
183	C9	0	71	0	0	0	0	0	0	0	0	0	0	0	0	0	0	0	0	0	0	0	0	10	1	0	0	0	0	0	0	0	0	0	14	1	0	0	0	0	0	0	0	0	0	0	0	0	0
184	D6	0	13	0	0	0	0	36	8	1	13	1	0	0	0	0	0	0	0	0	10	144	1	140	1	0	0	0	0	0	0	3220	810	1	820	1	0	0	0	0	0	0	0	0	39	1	0	0	0
185	E5	0	13	0	0	0	0	0	0	0	2	1	0	0	0	0	0	0	0	0	0	0	0	103	1	0	0	0	0	0	0	0	0	0	79	1	0	0	0	0	0	0	0	0	0	0	0	0	0
186	E5	1	9	0	0	0	0	0	0	0	2	1	0	0	0	0	0	0	0	0	0	0	0	154	1	0	0	0	0	0	0	0	0	0	70	1	0	0	0	0	0	0	0	0	3000	1	0	0	0
187	F3	1	51	0	0	0	0	0	0	0	0	0	0	0	0	0	0	0	33	1	47	0	1	35	1	0	0	0	0	35	1	0	169	1	44	1	0	0	0	0	0	0	0	0	0	0	0	200	1
188	F3	1	32	0	0	0	0	25	0	1	2	1	0	0	0	0	0	0	0	0	0	573	1	94	1	0	0	0	0	0	0	780	0	1	103	1	0	0	0	0	0	0	0	0	0	0	0	0	0
189	F3	1	23	0	0	0	0	33	0	1	11	1	0	0	0	0	0	0	0	0	0	790	1	528	1	0	0	0	0	0	0	1296	0	1	604	1	0	0	0	0	0	0	0	0	0	0	0	0	0
190	F4	1	46	0	0	0	0	0	3	1	0	0	0	0	0	0	0	0	0	0	15	0	1	15	1	0	0	0	0	0	0	0	27	1	29	1	0	0	0	0	0	0	0	0	0	0	0	0	0
191	F4	1	19	0	0	0	0	1	0	1	6	1	0	0	0	0	0	0	5	1	0	129	1	171	1	0	0	0	0	9	1	145	0	1	149	1	0	0	0	0	1	0	1	0	0	0	0	150	1
192	F9	1	45	0	0	0	0	0	0	0	4	1	0	0	0	0	0	0	0	0	0	0	0	68	1	0	0	0	0	0	0	0	0	0	24	1	0	0	0	0	0	0	0	0	0	0	0	0	0
193	F9	0	19	0	0	0	0	0	0	0	4	1	0	0	0	0	0	0	0	0	0	0	0	34	1	0	0	0	0	0	0	0	0	0	126	1	0	0	0	0	0	0	0	0	0	0	0	0	0
194	F9	1	15	0	0	0	0	0	0	0	0	0	0	0	0	0	0	0	0	0	0	0	0	22	1	0	0	0	0	0	0	0	0	0	23	1	0	0	0	0	6	0	1	0	2180	1	0	0	0
195	F9	0	13	0	0	0	0	10	0	1	2	1	0	0	0	0	0	0	4	1	0	24	1	39	1	0	0	0	0	39	1	340	46	1	17	1	0	0	0	0	0	0	0	0	165	1	0	425	1
196	F10	1	22	0	0	0	0	0	1	1	1	1	0	0	0	0	0	0	0	0	7	0	1	18	1	0	0	0	0	0	0	0	17	1	13	1	0	0	0	0	0	0	0	0	0	0	0	0	0
197	F10	0	18	0	0	0	0	0	0	0	1	1	0	0	0	0	0	0	9	1	0	0	0	63	1	0	0	0	0	20	1	0	0	0	35	1	0	0	0	0	0	0	0	0	0	0	0	47	1
198	B9	0	17	0	0	0	0	10	0	1	7	1	0	0	0	0	0	0	9	1	11	278	1	116	1	0	0	0	0	18	1	444	29	1	153	1	0	0	0	0	0	0	0	0	126	1	0	111	1
199	B9	1	13	0	0	0	0	14	0	1	1	1	0	0	0	0	0	0	0	0	3	235	1	26	1	0	0	0	0	0	0	372	14	1	33	1	0	0	0	0	1	0	1	0	83	1	0	0	0
200	B9	1	12	0	0	0	0	112	0	1	5	1	0	0	0	0	0	0	0	0	0	1155	1	36	1	0	0	0	0	0	0	2170	0	1	35	1	0	0	0	0	4	0	1	0	500	1	0	0	0
201	B9	0	4	0	0	0	0	9	0	1	0	0	0	0	0	0	0	0	0	0	0	180	1	1	1	0	0	0	0	0	0	294	4	1	13	1	0	0	0	0	0	0	0	0	0	0	0	0	0
202	C9	0	22	0	0	0	0	0	0	0	0	0	0	0	0	0	0	0	0	0	0	0	0	25	1	0	0	0	0	0	0	0	0	0	82	1	0	0	0	0	0	0	0	0	0	0	0	0	0
203	C9	1	6	0	0	0	0	2	0	1	6	1	0	0	0	0	0	0	0	0	0	133	1	322	1	0	0	0	0	0	0	0	422	1	518	1	0	0	0	0	0	0	0	0	0	0	0	0	0
204	F3	1	3	4	1	0	0	0	0	0	57	1	0	0	0	0	6	1	6	1	0	0	0	533	1	0	0	0	0	13	1	0	0	0	743	1	0	0	0	0	49	0	1	0	3500	1	0	0	0
205	F4	0	1	0	0	0	0	0	4	1	1	1	0	0	0	0	0	0	0	0	0	0	0	3	1	0	0	0	0	0	0	0	52	1	3	1	0	0	0	0	0	0	0	0	0	0	0	0	0
206	F5	0	27	0	0	0	0	0	0	0	0	0	0	0	0	0	0	0	0	0	0	0	0	0	0	0	0	0	0	0	0	0	0	0	0	0	0	0	0	0	0	0	0	0	0	0	0	0	0
207	F5	1	25	2	1	0	0	75	0	1	14	1	0	0	0	0	8	1	0	0	0	88	1	106	1	0	0	0	0	0	0	810	23	1	95	1	0	0	0	0	23	0	1	0	2138	1	0	2	1
208	F5	1	12	0	0	0	0	9	4	1	3	1	0	0	0	0	0	0	0	0	23	336	1	191	1	0	0	0	0	0	0	1448	155	1	164	1	0	0	0	0	0	0	0	0	0	0	0	0	0
209	F7	0	2	0	0	0	0	0	0	0	0	0	0	0	0	0	0	0	0	0	0	0	0	3	1	0	0	0	0	2	1	0	0	0	4	1	0	0	0	0	0	0	0	0	0	0	0	35	1
210	F9	0	47	0	0	0	0	0	0	0	0	0	0	0	0	0	0	0	0	0	0	0	0	1	1	0	0	0	0	0	0	0	0	0	8	1	2	1	0	0	0	0	0	0	0	0	0	0	0
211	F9	0	24	1	1	0	0	0	0	0	0	0	0	0	0	0	0	0	0	0	0	0	0	8	1	0	0	0	0	0	0	0	0	0	24	1	0	0	0	0	0	0	0	0	0	0	0	0	0
212	F9	0	22	0	0	0	0	0	0	0	0	0	0	0	0	0	0	0	0	0	8	0	1	43	1	0	0	0	0	0	0	0	97	1	51	1	0	0	0	0	0	0	0	0	0	0	0	0	0
213	F9	0	17	0	0	0	0	0	0	0	3	1	0	0	0	0	0	0	0	0	0	0	0	60	1	0	0	0	0	0	0	0	0	0	67	1	0	0	0	0	0	0	0	0	0	0	0	0	0
214	F9	1	9	0	0	0	0	0	0	0	1	1	0	0	0	0	0	0	0	0	0	0	0	10	1	0	0	0	0	0	0	0	0	0	4	1	0	0	0	0	0	0	0	0	0	0	0	0	0
215	H4	1	25	0	0	0	0	0	0	0	0	0	0	0	0	0	0	0	0	0	0	0	0	11	1	0	0	0	0	0	0	0	0	0	7	1	0	0	0	0	0	0	0	0	0	0	0	0	0
216	H4	1	9	0	0	0	0	36	0	1	11	1	0	0	0	0	0	0	0	0	2	394	1	362	1	0	0	0	0	0	0	2360	0	1	276	1	0	0	0	0	0	0	0	0	0	0	0	0	0
217	H4	0	6	0	0	0	0	0	0	0	2	1	0	0	0	0	0	0	0	0	0	0	0	21	1	0	0	0	0	0	0	0	0	0	90	1	0	0	0	0	0	0	0	0	0	0	0	0	0
218	H4	1	3	0	0	0	0	0	0	0	0	0	0	0	0	0	0	0	0	0	0	0	0	4	1	0	0	0	0	0	0	0	0	0	7	1	0	0	0	0	0	0	0	0	0	0	0	0	0
219	H4	1	55	0	0	0	0	0	0	0	2	1	0	0	0	0	0	0	0	0	0	0	0	12	1	0	0	0	0	2	1	0	0	0	15	1	0	0	0	0	0	0	0	0	0	0	0	16	1
220	H5	1	19	0	0	0	0	0	0	0	1	1	0	0	0	0	0	0	0	0	0	0	0	97	1	0	0	0	0	0	0	0	0	0	69	1	0	0	0	0	0	0	0	0	0	0	0	0	0
221	H7	1	20	0	0	0	0	0	0	0	0	0	0	0	0	0	0	0	0	0	0	0	0	0	0	0	0	0	0	0	0	0	0	0	0	0	0	0	0	0	0	0	0	0	0	0	0	0	0
222	H7	1	2	0	0	0	0	0	0	0	0	0	0	0	0	0	0	0	0	0	0	3	1	0	0	0	0	0	0	0	0	0	0	0	0	0	0	0	0	0	0	0	0	0	0	0	0	0	0
223	H8	1	10	0	0	0	0	0	0	0	0	0	0	0	0	0	0	0	0	0	0	0	0	26	1	0	0	0	0	0	0	0	17	1	79	1	0	0	0	0	0	0	0	0	0	0	0	0	0
224	B9	0	52	0	0	0	0	0	0	0	0	0	0	0	0	0	0	0	0	0	0	0	0	5	1	0	0	0	0	0	0	0	0	0	3	1	0	0	0	0	0	0	0	0	0	0	0	0	0
225	G4	1	18	0	0	0	0	0	0	0	20	1	0	0	0	0	0	0	0	0	0	0	0	446	1	0	0	0	0	0	0	0	0	0	235	1	0	0	0	0	0	0	0	0	0	0	0	0	0
226	G4	1	63	0	0	0	0	0	0	0	0	0	0	0	0	0	0	0	0	0	0	0	0	0	0	0	0	0	0	0	0	0	0	0	0	0	0	0	0	0	0	0	0	0	0	0	0	0	0
227	G4	1	23	0	0	0	0	57	44	1	65	1	0	0	0	0	0	0	0	0	64	74	1	172	1	0	0	0	0	0	0	423	255	1	380	1	0	0	0	0	0	0	0	0	0	0	0	0	0
228	G6	0	36	0	0	0	0	16	0	1	0	0	0	0	0	0	0	0	0	0	0	64	1	0	0	0	0	0	0	0	0	0	0	0	126	1	0	0	0	0	0	0	0	0	0	0	0	0	0
229	G6	1	33	0	0	0	0	6	0	1	6	1	0	0	0	0	0	0	0	0	0	50	1	122	1	0	0	0	0	0	0	121	0	1	115	1	0	0	0	0	0	0	0	0	0	0	0	0	0
230	G6	1	8	0	0	1	1	41	42	1	9	1	0	0	0	0	0	0	0	0	272	388	1	101	1	0	0	0	0	2	1	509	600	1	44	1	0	0	0	0	4	0	1	0	0	0	0	40000	1
231	H5	0	3	0	0	0	0	0	0	0	1	1	0	0	0	0	1	1	0	0	0	0	0	15	1	0	0	0	0	0	0	0	0	0	4	1	0	0	0	0	7	0	1	0	2187	1	0	0	0
232	A8	1	15	0	0	0	0	10	0	1	0	0	0	0	0	0	0	0	0	0	0	44	1	15	1	0	0	0	0	0	0	230	1	1	15	1	0	0	0	0	0	0	0	0	0	0	0	0	0
233	A8	1	8	0	0	0	0	0	0	0	6	1	0	0	0	0	0	0	0	0	0	0	0	269	1	0	0	0	0	0	0	0	0	0	123	1	0	0	0	0	0	0	0	0	0	0	0	0	0
234	A8	1	6	3	1	0	0	0	0	0	15	1	0	0	0	0	9	1	0	0	0	0	0	99	1	0	0	0	0	0	0	0	0	0	439	1	0	0	0	0	83	0	1	0	110000	1	0	0	0
235	A9	0	53	0	0	0	0	0	0	0	0	0	0	0	0	0	0	0	0	0	0	0	0	15	1	0	0	0	0	0	0	0	0	0	14	1	0	0	0	0	0	0	0	0	0	0	0	0	0
236	A9	1	42	0	0	0	0	0	0	0	0	0	0	0	0	0	0	0	37	1	0	0	0	85	1	0	0	0	0	31	1	0	0	0	38	1	0	0	0	0	0	0	0	0	31	1	0	227	1
237	A9	1	23	0	0	0	0	0	0	0	0	0	0	0	0	0	0	0	0	0	0	0	0	16	1	0	0	0	0	0	0	0	0	0	2	1	0	0	0	0	0	0	0	0	0	0	0	0	0
238	A9	1	20	0	0	0	0	0	0	0	0	0	0	0	0	0	0	0	0	0	0	0	0	0	0	0	0	0	0	0	0	0	0	0	0	0	0	0	0	0	0	0	0	0	0	0	0	0	0
239	A9	0	17	0	0	0	0	0	0	0	1	1	0	0	0	0	0	0	0	0	0	0	0	8	1	0	0	0	0	0	0	0	0	0	28	1	0	0	0	0	0	0	0	0	0	0	0	0	0
240	A9	0	11	0	0	0	0	0	0	0	6	1	0	0	0	0	0	0	0	0	0	0	0	46	1	0	0	0	0	0	0	0	0	0	199	1	0	0	0	0	0	0	0	0	301	1	0	0	0
241	A9	0	8	0	0	0	0	22	0	1	10	1	0	0	0	0	0	0	0	0	3	270	1	59	1	0	0	0	0	0	0	512	0	1	298	1	0	0	0	0	4	0	1	0	2500	1	0	0	0
242	A9	0	5	0	0	0	0	0	1	1	4	1	0	0	0	0	0	0	0	0	10	1	1	40	1	0	0	0	0	0	0	4	34	1	55	1	0	0	0	0	0	0	0	0	0	0	0	0	0
243	A9	1	4	0	0	0	0	21	0	1	0	0	0	0	0	0	0	0	0	0	0	337	1	0	0	0	0	0	0	0	0	356	0	1	0	0	0	0	0	0	0	0	0	0	0	0	0	0	0
244	A9	1	3	0	0	0	0	0	0	0	0	0	0	0	0	0	0	0	0	0	0	0	0	0	0	0	0	0	0	0	0	0	0	0	0	0	0	0	0	0	0	0	0	0	0	0	0	0	0
245	G3	1	19	0	0	1	1	0	14	1	7	1	0	0	0	0	0	0	22	1	5	0	1	412	1	0	0	0	0	55	1	0	316	1	184	1	0	0	0	0	0	0	0	0	0	0	0	60	1
246	G3	1	10	0	0	0	0	52	1	1	35	1	0	0	0	0	1	1	0	0	0	89	1	136	1	0	0	0	0	0	0	606	9	1	300	1	0	0	0	0	17	0	1	0	20500	1	0	0	0
247	G4	1	40	0	0	0	0	0	1	1	9	1	0	0	0	0	1	1	0	0	0	0	0	79	1	0	0	0	0	0	0	0	0	0	61	1	0	0	0	0	13	0	1	0	2415	1	0	0	0
248	G6	0	12	0	0	0	0	0	0	0	19	1	0	0	0	0	0	0	17	1	0	0	0	323	1	0	0	0	0	11	1	0	0	0	162	1	0	0	0	0	1	0	1	0	2000	1	0	30000	1
249	G6	0	8	0	0	0	0	76	70	1	1	1	0	0	0	0	0	0	0	0	5	102	1	2	1	0	0	0	0	0	0	286	234	1	5	1	0	0	0	0	0	0	0	0	0	0	0	0	0
250	C9	0	3	0	0	0	0	7	0	1	9	1	0	0	0	0	0	0	0	0	0	134	1	171	1	0	0	0	0	0	0	337	1	1	93	1	0	0	0	0	0	0	0	0	0	0	0	0	0
251	D10	0	31	0	0	0	0	0	2	1	4	1	0	0	0	0	0	0	3	1	3	0	1	32	1	0	0	0	0	1	1	0	17	1	6	1	0	0	0	0	0	0	0	0	0	0	0	1	1
252	F10	1	11	0	0	0	0	0	0	0	1	1	0	0	0	0	0	0	0	0	0	0	0	23	1	0	0	0	0	0	0	0	0	0	15	1	0	0	0	0	0	0	0	0	0	0	0	0	0
253	F10	0	7	0	0	0	0	0	0	0	9	1	0	0	0	0	0	0	0	0	0	0	0	229	1	0	0	0	0	0	0	0	0	0	170	1	0	0	0	0	0	0	0	0	0	0	0	0	0
254	F10	1	3	0	0	0	0	0	0	0	4	1	0	0	0	0	0	0	0	0	0	0	0	32	1	0	0	0	0	0	0	0	0	0	62	1	0	0	0	0	0	0	0	0	0	0	0	0	0
255	B10	1	48	0	0	1	1	8	0	1	2	1	0	0	0	0	0	0	18	1	0	44	1	61	1	0	0	0	0	7	1	41	0	1	46	1	0	0	0	0	4	0	1	0	139	1	0	255	1
256	B10	1	7	0	0	0	0	0	0	0	2	1	0	0	0	0	0	0	0	0	0	0	0	30	1	0	0	0	0	0	0	0	0	0	157	1	0	0	0	0	0	0	0	0	0	0	0	0	0
257	B10	1	6	4	1	0	0	1	0	1	9	1	0	0	0	0	0	0	0	0	0	29	1	103	1	0	0	0	0	0	0	74	0	1	385	1	0	0	0	0	11	0	1	0	20000	1	0	0	0
258	B10	0	6	0	0	0	0	0	0	0	8	1	0	0	0	0	0	0	0	0	0	0	0	36	1	0	0	0	0	0	0	0	0	0	66	1	0	0	0	0	0	0	0	0	0	0	0	0	0
259	B10	1	25	0	0	0	0	0	0	0	4	1	0	0	0	0	0	0	0	0	0	0	0	84	1	0	0	0	0	0	0	0	0	0	103	1	0	0	0	0	0	0	0	0	0	0	0	0	0
260	A8	0	25	0	0	0	0	0	0	0	1	1	0	0	0	0	0	0	0	0	0	0	0	2	1	0	0	0	0	0	0	0	0	0	2	1	0	0	0	0	0	0	0	0	0	0	0	0	0
261	A8	1	23	0	0	0	0	0	0	0	0	0	0	0	0	0	0	0	0	0	0	0	0	18	1	0	0	0	0	0	0	0	0	0	10	1	0	0	0	0	0	0	0	0	197	1	0	0	0
262	A8	1	28	0	0	0	0	0	6	1	1	1	0	0	0	0	0	0	4	1	3	0	1	17	1	0	0	0	0	0	0	0	16	1	18	1	0	0	0	0	0	0	0	0	0	0	0	90	1
263	A9	1	14	0	0	0	0	0	0	0	1	1	0	0	0	0	0	0	0	0	0	2	1	13	1	0	0	0	0	0	0	0	0	0	24	1	0	0	0	0	0	0	0	0	0	0	0	0	0
264	B10	1	17	0	0	0	0	22	3	1	35	1	0	0	0	0	0	0	0	0	0	56	1	169	1	0	0	0	0	0	0	780	53	1	940	1	0	0	0	0	1	0	1	0	0	0	0	0	0
265	C4	0	17	0	0	5	1	49	0	1	3	1	0	0	0	0	0	0	0	0	0	439	1	57	1	0	0	0	0	166	1	1150	0	1	80	1	0	0	0	0	0	0	0	0	0	0	0	5250	1
266	C8	0	13	0	0	0	0	0	0	0	3	1	0	0	0	0	0	0	0	0	0	0	0	10	1	0	0	0	0	0	0	0	0	0	38	1	0	0	0	0	0	0	0	0	0	0	0	0	0
267	C10	0	45	0	0	0	0	0	4	1	5	1	0	0	0	0	0	0	0	0	3	0	1	39	1	0	0	0	0	0	0	0	147	1	71	1	0	0	0	0	0	0	0	0	25	1	0	0	0
268	C10	1	30	0	0	0	0	0	0	0	0	0	0	0	0	0	0	0	0	0	0	0	0	0	0	0	0	0	0	0	0	0	0	0	0	0	0	0	0	0	0	0	0	0	0	0	0	0	0
269	C10	1	9	10	1	0	0	0	0	0	8	1	0	0	0	0	73	1	0	0	0	0	0	99	1	0	0	0	0	0	0	0	0	0	68	1	0	0	0	0	125	0	1	0	105000	1	0	0	0
270	C10	0	14	0	0	0	0	20	0	1	1	1	0	0	0	0	0	0	7	1	0	224	1	78	1	0	0	0	0	0	0	129	0	1	22	1	0	0	0	0	0	0	0	0	52	1	0	77	1
271	C10	1	11	0	0	0	0	0	0	0	11	1	0	0	0	0	0	0	0	0	0	0	0	175	1	0	0	0	0	0	0	0	0	0	376	1	0	0	0	0	0	0	0	0	0	0	0	0	0
272	G3	0	8	0	0	0	0	69	0	1	24	1	0	0	0	0	0	0	0	0	0	91	1	274	1	0	0	0	0	0	0	2910	0	1	458	1	0	0	0	0	0	0	0	0	0	0	0	0	0
273	G3	0	7	0	0	0	0	588	0	1	48	1	0	0	0	0	0	0	8	1	0	876	1	762	1	0	0	0	0	2	1	2000	2	1	294	1	0	0	0	0	0	0	0	0	0	0	0	109	1
274	G3	0	4	0	0	0	0	205	0	1	21	1	0	0	0	0	0	0	0	0	0	69	1	315	1	0	0	0	0	0	0	678	0	1	111	1	0	0	0	0	0	0	0	0	0	0	0	0	0
275	C8	1	21	0	0	0	0	0	0	0	1	1	0	0	0	0	0	0	0	0	0	0	0	12	1	0	0	0	0	0	0	0	0	0	17	1	0	0	0	0	1	0	1	0	18	1	0	0	0
276	C8	0	11	0	0	2	1	12	0	1	9	1	0	0	0	0	0	0	15	1	0	66	1	359	1	0	0	0	0	125	1	238	0	1	325	1	0	0	0	0	0	0	0	0	0	0	0	3	1
277	C8	0	43	0	0	0	0	0	0	0	1	1	0	0	0	0	8	1	0	0	0	0	0	19	1	0	0	0	0	0	0	0	0	0	29	1	0	0	0	0	16	1	1	0	900	1	0	0	0
278	C4	1	59	0	0	0	0	38	1	1	3	1	0	0	0	0	0	0	24	1	0	176	1	43	1	0	0	0	0	38	1	422	6	1	11	1	0	0	0	0	1	0	1	0	32	1	0	483	1
279	D7	0	43	0	0	0	0	76	0	1	33	1	0	0	0	0	0	0	0	0	1	212	1	335	1	0	0	0	0	0	0	515	0	1	195	1	0	0	0	0	0	0	0	0	0	0	0	0	0
280	D7	1	34	0	0	0	0	0	0	0	0	0	0	0	0	0	0	0	6	1	0	0	0	13	1	0	0	0	0	19	1	0	0	0	16	1	0	0	0	0	0	0	0	0	0	0	0	12000	1
281	F2	1	26	0	0	0	0	0	0	0	0	0	0	0	0	0	0	0	0	0	0	0	0	65	1	0	0	0	0	0	0	0	13	1	45	1	0	0	0	0	0	0	0	0	0	0	0	0	0
282	F2	1	7	1	1	0	0	0	0	0	0	0	0	0	0	0	2	1	0	0	0	0	0	0	0	0	0	0	0	0	0	0	0	0	1	1	0	0	0	0	76	0	1	0	2206	1	0	0	0
283	F8	0	36	4	1	0	0	0	0	0	1	1	0	0	0	0	3	1	0	0	0	0	0	2	1	0	0	0	0	0	0	0	0	0	5	1	0	0	0	0	4	1	1	0	5800	1	0	0	0
284	F8	1	29	0	0	1	1	82	0	1	7	1	0	0	0	0	0	0	7	1	0	134	1	74	1	0	0	0	0	16	1	610	0	1	63	1	0	0	0	0	2	0	1	0	0	0	0	116	1
285	G3	0	33	0	0	0	0	17	3	1	6	1	0	0	0	0	2	1	3	1	5	87	1	32	1	0	0	0	0	3	1	337	39	1	51	1	0	0	0	0	1	0	1	0	669	1	0	44	1
286	G5	0	7	1	1	0	0	19	0	1	29	1	0	0	0	0	1	1	0	0	4	80	1	120	1	0	0	0	0	0	0	174	2	1	415	1	0	0	0	0	11	0	1	0	10000	1	0	300	1
287	G5	0	2	0	0	0	0	17	0	1	0	0	0	0	0	0	4	1	0	0	0	126	1	3	1	0	0	0	0	0	0	306	1	1	19	1	0	0	0	0	26	0	1	0	0	0	0	0	0
288	D9	1	17	0	0	0	0	0	0	0	7	1	0	0	0	0	1	1	4	1	0	0	0	83	1	0	0	0	0	12	1	0	0	0	185	1	0	0	0	0	0	0	0	0	0	0	0	2	1
289	F2	0	50	0	0	0	0	0	0	0	0	0	0	0	0	0	0	0	0	0	0	0	0	25	1	0	0	0	0	0	0	0	0	0	44	1	0	0	0	0	1	0	1	0	226	1	0	0	0
290	F2	0	50	0	0	0	0	0	0	0	0	0	0	0	0	0	0	0	0	0	0	0	0	0	0	0	0	0	0	0	0	0	0	0	0	0	0	0	0	0	0	0	0	0	0	0	0	0	0
291	F8	0	3	1	1	0	0	87	2	1	0	0	0	0	0	0	22	1	2	1	3	728	1	46	1	0	0	0	0	3	1	850	21	1	52	1	0	0	0	0	140	0	1	0	60000	1	0	600	1
292	G9	0	47	0	0	0	0	0	0	0	0	0	0	0	0	0	0	0	0	0	0	0	0	2	1	0	0	0	0	0	0	0	0	0	11	1	0	0	0	0	0	0	0	0	0	0	0	0	0
293	G9	0	6	0	0	0	0	0	0	0	7	1	0	0	0	0	0	0	10	1	0	0	0	128	1	0	0	0	0	23	1	0	0	0	179	1	0	0	0	0	0	0	0	0	0	0	0	156	1
294	G9	0	14	0	0	0	0	120	17	1	6	1	0	0	0	0	0	0	4	1	7	453	1	94	1	0	0	0	0	4	1	808	75	1	121	1	0	0	0	0	1	0	1	0	311	1	0	40	1
295	G9	0	7	0	0	0	0	15	4	1	2	1	0	0	0	0	0	0	2	1	18	386	1	51	1	0	0	0	0	5	1	413	20	1	104	1	0	0	0	0	0	0	0	0	0	0	0	206	1
296	G9	0	3	0	0	0	0	113	4	1	22	1	0	0	0	0	0	0	0	0	0	438	1	385	1	0	0	0	0	0	0	687	21	1	65	1	0	0	0	0	0	0	0	0	0	0	0	0	0
297	G9	0	11	1	1	1	1	4	0	1	3	1	0	0	0	0	9	1	100	1	5	69	1	476	1	0	0	0	0	114	1	164	6	1	389	1	0	0	0	0	41	0	1	0	2500	1	0	520	1
298	H6	1	25	0	0	0	0	0	0	0	13	1	0	0	0	0	0	0	25	1	0	0	0	408	1	0	0	0	0	24	1	0	0	0	243	1	0	0	0	0	0	0	0	0	4	1	0	10	1
299	H6	1	5	0	0	0	0	129	6	1	83	1	0	0	0	0	0	0	5	1	5	163	1	239	1	0	0	0	0	14	1	895	28	1	590	1	0	0	0	0	0	0	0	0	0	0	0	214	1
300	H6	0	1	0	0	0	0	108	58	1	12	1	0	0	0	0	7	1	0	0	5	470	1	162	1	0	0	0	0	0	0	437	223	1	100	1	0	0	0	0	17	0	1	0	0	0	0	0	0
301	D8	0	41	0	0	3	1	0	0	0	2	1	0	0	0	0	0	0	6	1	0	0	0	7	1	0	0	0	0	117	1	0	0	0	7	1	0	0	0	0	0	0	0	0	0	0	0	313	1
302	D8	1	25	0	0	0	0	0	0	0	0	0	0	0	0	0	0	0	0	0	0	0	0	0	0	0	0	0	0	0	0	0	0	0	6	1	0	0	0	0	0	0	0	0	0	0	0	0	0
303	D8	0	18	0	0	0	0	0	0	0	8	1	0	0	0	0	0	0	0	0	0	0	0	274	1	0	0	0	0	0	0	0	0	0	329	1	0	0	0	0	0	0	0	0	0	0	0	0	0
304	D9	1	14	0	0	0	0	0	0	0	0	0	0	0	0	0	0	0	0	0	0	0	0	0	0	0	0	0	0	0	0	0	0	0	0	0	0	0	0	0	0	0	0	0	0	0	0	0	0
305	G7	0	6	0	0	0	0	2	23	1	12	1	0	0	0	0	0	0	4	1	108	12	1	288	1	0	0	0	0	59	1	32	332	1	362	1	0	0	0	0	0	0	0	0	0	0	0	20000	1
306	G7	0	20	0	0	0	0	0	0	0	2	1	0	0	0	0	0	0	4	1	0	0	0	54	1	0	0	0	0	14	1	0	0	0	46	1	0	0	0	0	0	0	0	0	0	0	0	17	1
307	G9	0	23	0	0	0	0	0	0	0	3	1	0	0	0	0	0	0	15	1	0	0	0	81	1	0	0	0	0	25	1	0	0	0	31	1	0	0	0	0	0	0	0	0	0	0	0	36	1
308	G7	0	35	0	0	0	0	0	0	0	0	0	0	0	0	0	0	0	0	0	0	0	0	4	1	0	0	0	0	0	0	0	0	0	8	1	0	0	0	0	0	0	0	0	0	0	0	0	0
309	G7	1	1	0	0	0	0	0	0	0	0	0	0	0	0	0	0	0	0	0	0	0	0	0	0	0	0	0	0	3	1	0	0	0	0	0	0	0	0	0	0	0	0	0	0	0	0	25	1
310	G7	0	30	0	0	0	0	0	0	0	0	0	0	0	0	0	0	0	0	0	0	1	1	45	1	0	0	0	0	0	0	0	0	0	27	1	0	0	0	0	0	0	0	0	0	0	0	0	0
311	G7	1	12	0	0	0	0	0	0	0	1	1	0	0	0	0	0	0	0	0	0	0	0	36	1	0	0	0	0	0	0	0	0	0	37	1	0	0	0	0	0	0	0	0	0	0	0	0	0
312	C8	1	3	0	0	0	0	4	0	1	4	1	0	0	0	0	0	0	2	1	26	180	1	62	1	0	0	0	0	1	1	149	34	1	90	1	0	0	0	0	0	0	0	0	0	0	0	2	1
313	C8	1	40	0	0	0	0	0	1	1	2	1	0	0	0	0	0	0	0	0	15	0	1	64	1	0	0	0	0	0	0	0	11	1	28	1	0	0	0	0	0	0	0	0	0	0	0	0	0
314	D8	1	39	0	0	0	0	0	0	0	3	1	0	0	0	0	0	0	0	0	0	0	0	39	1	0	0	0	0	0	0	0	0	0	55	1	0	0	0	0	0	0	0	0	0	0	0	0	0
315	G7	0	3	0	0	0	0	0	5	1	1	1	0	0	0	0	0	0	0	0	0	0	0	5	1	0	0	0	0	0	0	0	30	1	32	1	0	0	0	0	1	0	1	0	200	1	0	1000	1
316	G8	0	11	0	0	0	0	6	0	1	8	1	0	0	0	0	0	0	0	0	0	213	1	121	1	0	0	0	0	410	1	1	115	1	0	0	0	0	0	0	0	0	0	0	0	0	0	0	0
317	G9	1	42	0	0	0	0	8	0	1	8	1	0	0	0	0	0	0	9	1	0	70	1	164	1	0	0	0	0	13	1	207	3	1	258	1	0	0	0	0	1	0	1	0	77	1	0	0	0
318	G9	1	20	0	0	0	0	7	0	1	4	1	0	0	0	0	0	0	0	0	0	73	1	19	1	0	0	0	0	0	0	435	0	1	44	1	0	0	0	0	0	0	0	0	0	0	0	0	0
319	G8	1	72	0	0	0	0	0	0	0	0	0	0	0	0	0	16	1	0	0	0	0	0	0	0	0	0	0	0	0	0	0	0	0	0	0	0	0	0	0	77	0	1	0	7000	1	0	0	0
320	F6	1	14	0	0	0	0	0	0	0	0	0	0	0	0	0	0	0	0	0	0	0	0	2	1	0	0	0	0	0	0	0	0	0	0	0	0	0	0	0	0	0	0	0	0	0	0	0	0
321	F6	1	22	0	0	0	0	0	0	0	3	1	0	0	0	0	0	0	0	0	0	0	0	213	1	0	0	0	0	0	0	0	0	0	134	1	0	0	0	0	0	0	0	0	0	0	0	0	0
322	D9	1	22	0	0	0	0	0	7	1	2	1	0	0	0	0	0	0	0	0	11	0	1	15	1	0	0	0	0	0	0	0	22	1	20	1	0	0	0	0	0	0	0	0	0	0	0	0	0
323	G8	1	6	0	0	0	0	0	0	0	0	0	0	0	0	0	0	0	0	0	1	0	1	4	1	0	0	0	0	0	0	0	7	1	2	1	0	0	0	0	0	0	0	0	0	0	0	0	0
[truncated: 78 more columns]

## Sheet: legend
Variable name	Definition	(Categories)		Abbreviations
ID	sample identification number			St	Strongyloides stercoralis
household	household number			Hw	hookworm
gender	gender (0=male; 1=female)			As	Ascaris lumbricoides
age	age in years			Tr	Trichuris trichiura
sl1_d	Number of St L1 larvae in direct smear			Sm	Schistosoma mansoni
std_pos	direct smear positive for St			Sh	Schistosoma haematobium
hw_d	Number of Hw eggs in direct smear			Edh	Entamoeba histolytica/ Entamoeba dispar
hwd_pos	direct smear positive for Hw			Ec	Entamoeba coli
asf_d	Number of fertilized As eggs in direct smear			Eh (microscopy only)	Entamoeba hartmanni
asu_d	Number of unfertilized As eggs in direct smear			Eh (PCR only)	Entamoeba histolytica
asd_pos	direct smear positive for As			Ib	Iodamoeba bütschlii
tr_d	Number of Tr eggs in direct smear			En	Endolimax nana
trd_pos	direct smear positive for Tr			Gl	Giardia intestinalis
sm_d	Number of Sm eggs in direct smear			Cr	Cryptosporidium
smd_pos	direct smear positive for Sm			Cy	Cyclospora
sh_d	Number of Sh eggs in direct smear			Is	Isospora belli
shd_pos	direct smear positive for Sh			Ch	Chilomastix
sl1_r	Number of St L1 larvae in formal-ether concentration			Bl	Blastocystis
str_pos	Formal-ether concentration positive for St			Eb	Enterocytozoon bieneusi
hw_r	Number of Hw eggs in formal-ether concentration			Ei	Encephalitozoon spp.
hwr_pos	Formal-ether concentration positive for Hw			Ms	microsporidia
asf_r	Number of fertilized As eggs in formal-ether concentration
asu_r	Number of unfertilized As eggs in formal-ether concentration			Ct	Ct-value
asr_pos	Formal-ether concentration positive for As
tr_r	Number of Tr eggs in formal-ether concentration			-1	Missing
trr_pos	Formal-ether concentration positive for Tr
sm_r	Number of Sm eggs in formal-ether concentration
smr_pos	Formal-ether concentration positive for Sm
sh_r	Number of Sh eggs in formal-ether concentration
shr_pos	Formal-ether concentration positive for Sh
hw_k	Number of Hw eggs in single 25 mg kato
hwk_pos	Kato postive for Hw
asf_k	Number of fertilised As eggs in single 25 mg kato
asu_k	Number of unfertilised As eggs in single 25 mg kato
ask_pos	Kato postive for As
tr_k	Number of Tr eggs in single 25 mg kato
trk_pos	Kato postive for Tr
sm_k	Number of Sm eggs in single 25 mg kato
smk_pos	Kato postive for Sm
sh_k	Number of Sh eggs in single 25 mg kato
shk_pos	Kato postive for Sh
sl1_b	Number of St L1 larvae in Baermann
sl3_b	Number of St L3 larvae in Baermann
stb_pos	Baermann positive for St
sl1_c	Number of St L1 larvae in coproculture
sl3_c	Number of St L3 larvae in coproculture
stc_pos	coproculture positive for St
hw1_c	Number of Hw L1 larvae in coproculture
hw3_c	Number of Hw L3 larvae in coproculture
hwc_pos	coproculture positive for Hw
stm_pos	Any microscopy test positive for St
hwm_pos	Any microscopy test positive for Hw
asm_pos	Any microscopy test positive for As
trm_pos	Any microscopy test positive for Tr (=CRS)
smm_pos	Any microscopy test positive for Sm
ct_st	Ct St PCR
pcr_st	PCR Positive for St
ct_phvs	Ct spike in St PCR
ct_stb	Ct St PCR on Baermann medium
pcr_stb	PCR on Baermann medium Positive for St
ct_phvsb	Ct spike in St PCR on Baermann medium
ct_stc	Ct St PCR on coproculture medium
pcr_stc	PCR on coproculture medium Positive for St
ct_phvsc	Ct spike in St PCR on coproculture medium
ct_na	Ct Necator PCR
pcr_na	PCR positive for Necator americanus
ct_ad	Ct Ancylostoma PCR
pcr_ad	PCR positive for Ancylostoma duodenale
pcr_hw	PCR positive for Hw
ct_phvhw	Ct spike in Hw PCR
ct_as	Ct As PCR
pcr_as	PCR positive for As
ct_phvas	Ct spike in As PCR
ct_sch	Ct Schistosoma PCR
pcr_sch	PCR positive for Schistosoma
st_pos	CRS St
hw_pos	CRS Hw
as_pos	CRS As
sm_pos	CRS Sm
edh_d	Number of Edh cysts in direct smear (categorical)	Categories:
ec_d	Number of Ec cysts in direct smear (categorical)	1	=1 parasite per >10 microscopy fields
eh_d	Number of Eh cysts in direct smear (categorical)	2	=1 parasite per 1 to 10 fields
ib_d	Number of Ib cysts in direct smear (categorical)	3	=1 to 10 parasites per field
en_d	Number of En cysts in direct smear (categorical)	4	=>10 parasites per field
gl_d	Number of Gl cysts in direct smear (categorical)
cr_d	Number of Cr in direct smear (categorical)
cy_d	Number of Cy in direct smear (categorical)
is_d	Number of Is in direct smear (categorical)
ch_d	Number of Ch in direct smear (categorical)
bl_d	Number of Bl in direct smear (categorical)
edh_r	Number of Edh cysts in formal-ether concentration (categorical)	Categories:
ec_r	Number of Ec cysts in formal-ether concentration (categorical)	1	=1 parasite per >10 microscopy fields
eh_r	Number of Eh cysts in formal-ether concentration (categorical)	2	=1 parasite per 1 to 10 fields
ib_r	Number of Ib cysts in formal-ether concentration (categorical)	3	=1 to 10 parasites per field
en_r	Number of En cysts in formal-ether concentration (categorical)	4	=>10 parasites per field
gl_r	Number of Gl cysts in formal-ether concentration (categorical)
cr_r	Number of Cr in direct formal-ether concentration (categorical)
cy_r	Number of Cy in direct formal-ether concentration (categorical)
is_r	Number of Is in direct formal-ether concentration (categorical)
ch_r	Number of Ch in direct formal-ether concentration (categorical)
bl_r	Number of Bl in direct formal-ether concentration (categorical)
edh_m_pos	Any microscopy test positive for Edh
ec_m_pos	Any microscopy test positive for Ec (=CRS)
eh_m_pos	Any microscopy test positive for Eh (=CRS)
ib_m_pos	Any microscopy test positive for Ib (=CRS)
en_m_pos	Any microscopy test positive for En (=CRS)
gl_m_pos	Any microscopy test positive for Gl
cr_m_pos	Any microscopy test positive for Cr
cy_m_pos	Any microscopy test positive for Cy (=CRS)
is_m_pos	Any microscopy test positive for Is (=CRS)
ch_m_pos	Any microscopy test positive for Ch (=CRS)
bl_m_pos	Any microscopy test positive for Bl (=CRS)
ct_eh	Ct Entamoeba histolytica PCR
pcr_eh	PCR positive for Entamoeba histolytica
ct_gl	Ct Gl PCR
pcr_gl	PCR positive for Gl
ct_cr	Ct Cr PCR
pcr_cr	PCR positive for Cr
ct_phhgc	Ct spike in Eh/Gl/Cr PCR
ct_eb	Ct Eb PCR
pcr_eb	PCR positive for Eb
ct_ei	Ct Ei PCR
pcr_ei	PCR positive for Ei
pcr_ms	PCR positive for Ms (Eb+Ei)
ct_phvms	Ct spike in M-PCR
edh_pos	CRS Edh
gl_pos	CRS Gl
cr_pos	CRS Cr
